# Supplementary material for: Mining the bladder cancer-associated genes by an integrated strategy for the construction and analysis of differential co-expression networks
Source: PubMed Central journal article supplement (PMC4331807; doi:10.1186/1471-2164-16-s3-s4), 2015-01-29
Supplement: 1471-2164-16-S3-S4-S5.pdf [file 1471-2164-16-S3-S4-S5.pdf]

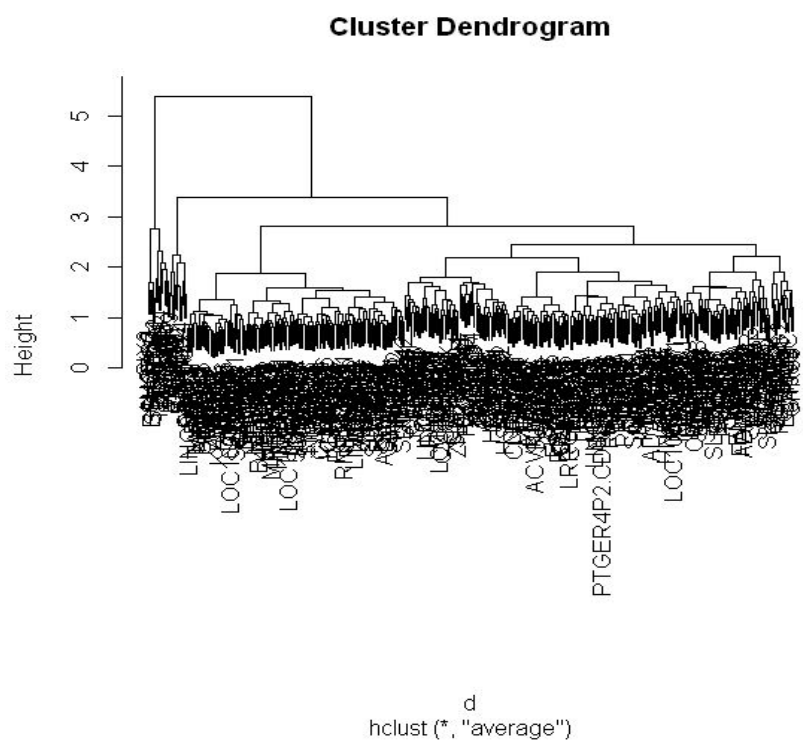

(a) The normal state

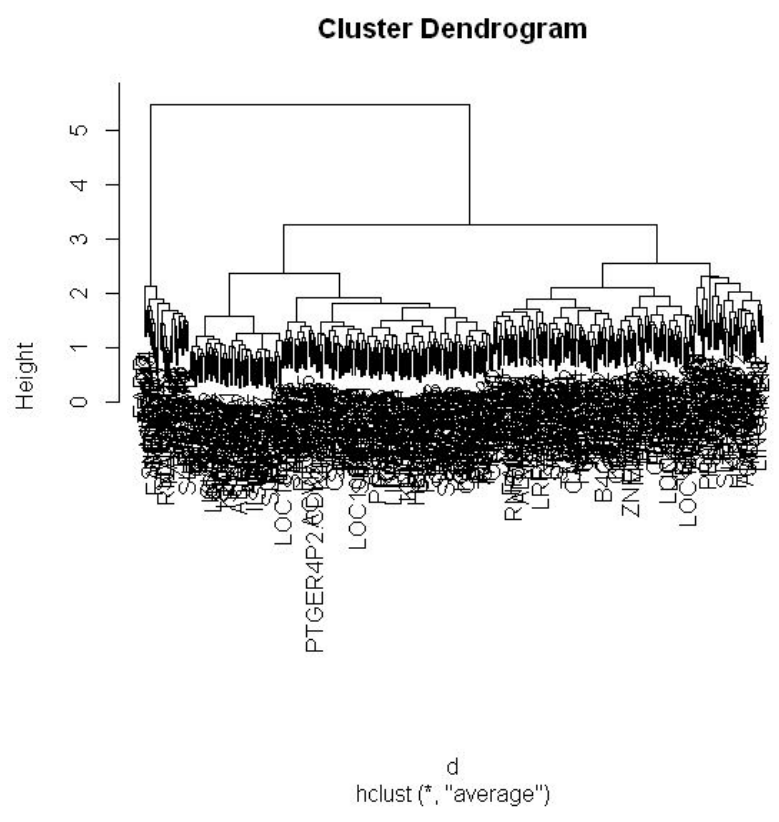

(b) The cancer state

The clustering of the DCGs at two different states.
